## Research Article

# FOXD1 expression in head and neck squamous carcinoma: a study based on TCGA, GEO and meta-analysis

Junjie Huang,  Bin Liang and  Tianjiao Wang

Department of Bioinformatics, Key Laboratory of Cell Biology, Ministry of Public Health, and Key Laboratory of Medical Cell Biology, Ministry of Education, School of Life Sciences, China Medical University, Shenyang 110122, China

Correspondence: Tianjiao Wang (tjwang@cmu.edu.cn)

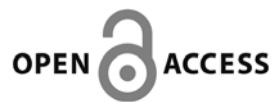

Forkhead box D1 (*FOXD1*) is a new member of FOX transcription factor family. *FOXD1* has demonstrated multilevel roles during normal development, and several diseases' pathogenesis. However, little is known about the role of *FOXD1* in the progression of head and neck squamous cancer (HNSC). In the present study, we analyzed *FOXD1* expression pattern using The Cancer Genome Atlas (TCGA) dataset, Gene Expression Omnibus (GEO) datasets, HNSC cell lines, and HNSC tissues. Then, we analyzed the correlation between *FOXD1* expression and clinical characteristics, and evaluated the prognostic value of *FOXD1* in HNSC. Moreover, we assessed the relationship between *FOXD1* expression and tumor microenvironment (TME) and immune cell infiltration using Estimation of STromal and Immune cells in MAlignant Tumor tissues using Expression data (ESTIMATE) and Cell-type Identification By Estimating Relative Subsets Of known RNA Transcripts (CIBERSORT) algorithms. Finally, we predicted the *FOXD1*-related biological processes (BPs) and signal pathways. *FOXD1* was up-regulated in HNSC tissues in TCGA datasets, validated by GEO datasets, HNSC cell lines and HNSC tissues. *FOXD1* expression was significantly associated with tumor site and HPV infection. Univariate and multivariate Cox regression analyses showed that *FOXD1* expression was an independent prognostic factor. Moreover, we found that the proportions of naïve B cells, plasma cells, and resting dendritic cells (DCs) were negatively correlated with *FOXD1* expression, otherwise, the proportion of activated mast cells was positively correlated with *FOXD1* expression using CIBERSORT algorithm. Gene Set Enrichment Analyses (GSEAs) revealed that *FOXD1* was mainly involved in cancer-related signaling pathway and metabolism-related pathways. *FOXD1* was a potential oncogene, and might represent an indicator for predicting overall survival (OS) of HNSC patients. Moreover, many cancer-related pathways and metabolism-related processes may be regulated by *FOXD1*.

## Introduction

Head and neck cancer (HNC) is an aggressive malignant tumor arising in oral cavity, oropharynx, hypopharynx and larynx, representing the sixth most common cancer and fifth leading cause of cancer-related deaths worldwide [1]. It is estimated that more than 51000 new cases of HNC were diagnosed in 2018, resulting in an annual incidence of 10000 deaths in United States [2]. The vast majority of HNC are squamous carcinomas (head and neck squamous cancer, HNSC), accounting for more than 90% of HNC. Over the past 30 years, even if the combination of surgery, chemotherapy, radiotherapy and novel immune checkpoint inhibitors have been applied, the 5-year survival rate for HNSC, especially for advanced HNSC patients, has not yet been remarkably improved. Growing evidence has demonstrated that HNSC is a highly complex and heterogeneous disease, involving distinct histological types, different

Received: 21 January 2021  
Revised: 13 July 2021  
Accepted: 13 July 2021Accepted Manuscript Online:  
15 July 2021  
Version of Record published:  
28 July 2021

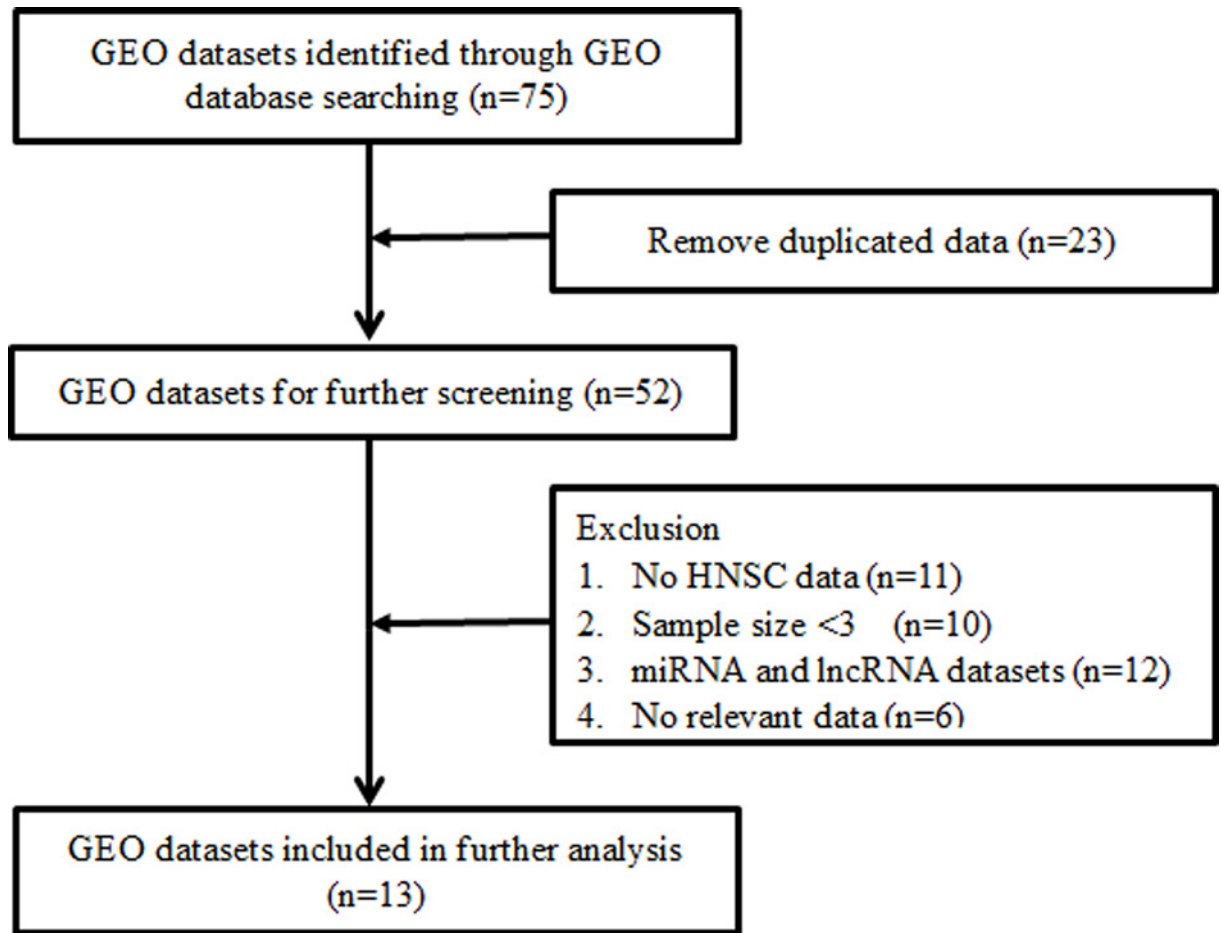

Figure 1. Flow chart of the GEO dataset selection process

anatomical sites and varied genetic and molecular alterations, thus, hampering the clinicians to accurately diagnose, guide individualized treatment, and improve the prognosis of HNSC patients. Therefore, there is still an urgent need to explore the effective biomarkers and underlie the molecular mechanism in the development and progression of HNSC.

Forkhead box D1 (*FOXD1*), also known as *FKHL8*, *FREAC-4* and *FREAC4*, is a new member of FOX transcription factor family and located on 5q13.2. *FOXD1* has demonstrated multilevel roles during normal development, adult physiology, and several diseases' pathogenesis. Previous studies reported that *FOXD1* was a mediator and indicator in the process of cell programming, especially in kidney development [3–5]. Herrera et al. reported that *foxd1* plays a dual role in retinal ganglion cell axon migration through the optic chiasm [6]. Moreover, accumulating evidence has demonstrated that *FOXD1* is implicated in the carcinogenesis, including lung cancer [7], colorectal cancer [8], ovarian cancer [9], breast cancer [10], nasopharyngeal carcinoma [11], gastric cancer [12], and prostate cancer [13]. Gao et al. also found that *FOXD1* was up-regulated and directly correlated with the glioma grade, and regulated glioblastoma cell behaviors [14]. However, little is known about the role of *FOXD1* in the progression of HNSC.

In the present study, we analyzed *FOXD1* expression pattern using The Cancer Genome Atlas (TCGA) and Gene Expression Omnibus (GEO) datasets. First, we investigated the *FOXD1* expression between HNSC tissues and normal tissues, analyzed the correlation between *FOXD1* expression and clinical characteristics, and evaluated the prognostic value of *FOXD1*. Moreover, we assessed the relationship between *FOXD1* expression and tumor microenvironment (TME) and immune cell infiltration using Estimation of STromal and Immune cells in MAlignant Tumor tissues using Expression data (ESTIMATE) and Cell-type Identification By Estimating Relative Subsets Of known RNA Transcripts (CIBERSORT) algorithms. Accordingly, the relationship between *FOXD1* expression and underlying biological functions and signal pathways in HNSC was analyzed using Gene Set Enrichment Analysis (GSEA) tool. Together, our

**Table 1** The characteristics of selected GEO datasets of HNSC

| Datasets  | Contributor (year)       | Disease type                          | Experimental platform                                           | Number of cases (cancer/control) |
|-----------|--------------------------|---------------------------------------|-----------------------------------------------------------------|----------------------------------|
| GSE6631   | Kuriakose et al.(2007)   | Head and neck squamous cell carcinoma | Affymetrix Human Genome U95 Array                               | 22/22                            |
| GSE19089  | Tuch et al. (2009)       | Oral cancer                           | Illumina HumanHT-12 V3.0 beadchip                               | 3/3                              |
| GSE23558  | Ambatipudi et al. (2011) | Oral squamous cell carcinoma          | Agilent-014850 Human Genome Microarray                          | 27/5                             |
| GSE25099  | Peng et al. (2011)       | Oral squamous cell carcinoma          | Affymetrix Human Exon 1.0 ST Array                              | 57/22                            |
| GSE30784  | Chen et al. (2011)       | Oral squamous cell carcinoma          | Affymetrix Human Genome U133 Array                              | 167/45                           |
| GSE31056  | Reis et al. (2011)       | Oral squamous cell carcinoma          | Affymetrix Human Genome U133 Array                              | 23/24                            |
| GSE74530  | Oghumu et al. (2017)     | Oral squamous cell carcinoma          | Affymetrix Human Genome U133 Array                              | 6/6                              |
| GSE78060  | Enokida et al. (2017)    | Tongue squamous cell carcinoma        | Affymetrix Human Genome U133 Array                              | 26/4                             |
| GSE85195  | Bhosale et al. (2017)    | Oral squamous cell carcinoma          | Agilent-014850 Human Genome Microarray                          | 34/16                            |
| GSE13601  | Singh et al. (2008)      | Oral tongue cancer                    | Affymetrix Human Genome U95 Array                               | 31/26                            |
| GSE31405  | Rentoft et al. (2011)    | Tongue carcinoma                      | Illumina HumanHT-12 WG-DASL V4.0 R2 beadchip                    | 62/16                            |
| GSE34106  | Rentoft et al. (2011)    | Tongue carcinoma                      | Illumina HumanHT-12 WG-DASL V4.0 R2 beadchip                    | 28/15                            |
| GSE146483 | Kase (2020)              | Oral squamous carcinoma               | Agilent-039494 SurePrint G3 Human GE v2 8×60K Microarray 039381 | 8/3                              |

results could provide a new insight into the potential mechanism contributing to HNSC development and progression, and highlight new targets for clinical treatment.

## Materials and methods

### Overview of *FOXD1* gene

*FOXD1* expressions were compared between cancer tissues and normal tissues across all TCGA tumors using TIMER online tool (<http://timer.cistrome.org/>). In addition, we analyzed the significant *FOXD1*-correlated genes using LinkedOmics online database (<http://linkedomics.org>). The LinkedOmics database contains multiomics data for 32 cancer types and a total of 11158 patients from TCGA project. Then, we evaluated the biological functions and pathways for *FOXD1* and *FOXD1*-correlated genes through STRING database (<https://string-db.org/>).

### Data collection

The RNA-sequencing data and related clinical information were downloaded from TCGA database (<https://www.cancer.gov/tcga>). The sample inclusion criteria: completed *FOXD1* sequencing data and detailed clinical information, including age, gender, TNM stage, follow-up information.

The microarray HNSC datasets were searched from GEO database (<http://www.ncbi.nlm.nih.gov/geo/>) up to December 2020. The search terms included the following keywords: (head OR neck OR oral) AND (tumor OR cancer OR carcinoma OR neoplasm). Each GEO dataset should meet the following criteria: (1) completed *FOXD1* expression data; (2) study including HNSC and control group; (3) the number of each group was greater than three. The flow diagram of the GEO dataset selection is shown in Figure 1. All characteristics of GEO datasets are listed in Table 1.

### *FOXD1* expression patterns in HNSC patients

*FOXD1* expressions were compared between HNSC tissues and normal tissues in TCGA and GEO datasets. We also compared *FOXD1* expression between paired normal and tumor tissues. Moreover, the associations between *FOXD1* expression and clinical parameters were evaluated using TCGA dataset, including age, gender, distant metastasis, clinical stage, T stage, N stage and HPV status. A  $P < 0.05$  was considered significant.

## Association of *FOXD1* expression and clinical outcomes

Kaplan–Meier curves were used to evaluate the correlation between *FOXD1* expression and overall survival (OS), tested by Log-Rank test. Univariate and multivariate Cox regression analyses were performed to evaluate the independent prognostic value of *FOXD1*, as well as age, gender, distant metastasis, clinical stage, N stage, and T stage in HNSC. All independent prognostic parameters identified by multivariate Cox regression analyses were used to construct a nomogram to investigate the probability of 3- and 5-year OS of HNSC. The concordance index (C-index) was calculated to quantify the discrimination performance of this nomogram. The calibration curve was plotted to assess whether the predict probability was in agreement with actual rate in the nomogram.

## Relationship of *FOXD1* expression and TME

TME provides a more complex matrix around tumor cells, which contributes to tumor development, progression, metastasis, and drug resistance [15]. We adopted ESTIMATE method to calculate the stromal score and immune score, inferring the tumor purity for TCGA dataset. The stromal score and immune score were compared between high- and low- *FOXD1* expression group. Moreover, the CIBERSORT algorithm was performed to analyze the transcript data from TCGA dataset and calculate the proportions of immune infiltrating cell subtypes. Moreover, the correlation between *FOXD1* expression and the proportion of immune cell subtype was evaluated by Pearson correlation coefficient.

## GSEA

GSEA was employed to identify the underlying biological functions and pathways of high- and low-*FOXD1* expression groups. The reference gene sets ‘c2.cp.kegg.v7.2.symbols.gmt gene sets’ and ‘C5.go.bp.v7.2.symbols.gmt gene set’, were obtained from the Molecular Signatures Database (MSigDB). The nominal *P*-value <0.05 and normalized enrichment score (NES) < 25% were considered significant.

## Cell lines

The human normal oral epithelial cells HOEC were obtained from Keygen Company Co., Ltd. HNSC cell lines CAL-27, SCC-9, and TCA-8113 were purchased from ATCC. HOEC and HNSC cell lines were cultured in 1640 and DMEMs containing 10% fetal bovine serum (Thermo Fisher Scientific, Waltham, MA) at 37°C and 5% CO<sub>2</sub> in an incubator, separately.

## Real-time polymerase chain reaction

Total RNA was extracted by TRIzol reagent (Invitrogen) and cDNA was synthesized using PrimeScript™ RT reagent Kit with gDNA Eraser (TaKaRa, Japan). The real-time polymerase chain reaction (RT-qPCR) was performed to determine RNA level using SYBR Green PCR Kit (TaKaRa, Japan). The primer sequences for the detection of *FOXD1* were 5′-TGAGCACTGAGATGTCCGATG-3′ (forward primer) and 5′-CACCACGTCGATGTCTGTTTC-3′ (reverse primer). Glyceraldehyde-3-phosphate dehydrogenase (GAPDH) was amplified to normalize *FOXD1* levels. The expression level was calculated by 2<sup>-ΔΔC<sub>t</sub></sup> method. Each sample was measured in triplicates.

## Western blotting

Cells were lysed with RIPA Buffer (Beyotime Biotechnology Institute). Denatured proteins were separated on 10% SDS/PAGE and transferred on to PVDF membranes. The blocked membranes were incubated with primary *FOXD1* antibody (Absin Bioscience, Inc) at 4°C overnight, and then incubated with horseradish peroxidase-conjugated goat anti-rabbit secondary antibody (Cell Signaling Technology, Inc) at room temperature for 2 h. Protein band was visualized by enhanced chemiluminescence reagent (Thermo Fisher Scientific, Inc.).

## Immunohistochemical staining evaluation

Primary HNSC tissues were collected from HNSC patients, who underwent surgical resection in the School and Hospital of Stomatology, China Medical University. All patients received no preoperative chemotherapy, immune therapy, and radiation therapy. The study was approved by the Ethics Committee of China Medical University. All study involving human participants were in accordance with the Declaration of Helsinki. All the enrolled participants provided written informed consent.

Paraffin-embedded tissue blocks were sectioned into 4-μm-thick sections for immunohistochemistry. All samples were deparaffinized and rehydrated. The citrate buffer (pH 6.0) and 3% hydrogen peroxide were used for antigen retrieval and endogenous peroxidase activity blocking, respectively. Then, all slides were incubated with goat

anti-FOXD1 polyclonal antibody (1:100, Abcam Company, #ab129324) overnight at 4°C, followed by incubating with rabbit anti-goat horseradish peroxidase (HRP)-conjugated secondary antibody at room temperature for 30 min. Finally, all slides were visualized using DAB Horseradish Peroxidase Color Development Kit (Maixin Co., Fuzhou, China).

## Statistical analysis

All data were analyzed using R software (version 3.6.3) and SPSS 22.0 (SPSS Inc., Chicago, IL, U.S.A.). All data were expressed as mean  $\pm$  standard deviation (SD). Statistical differences were evaluated using Student's *t* tests or one-way ANOVA. Survival analyses were evaluated using Kaplan–Meier curve and Log-rank test. The univariate and multivariate Cox regression analyses were performed to identify the potential prognostic values of FOXD1 and clinical parameters. Pearson correlation analysis was used to assess the relationship between FOXD1 expression and the proportion of immune cell subtype. *P*-value < 0.05 was considered significant.

## Results

### Overview of FOXD1 expression pattern and features

We analyzed tumor samples from TCGA database to identify FOXD1 expression characteristics (Figure 2A). FOXD1 expression was up-regulated in breast invasive carcinoma (BRCA), cholangiocarcinoma (CHOL), colon adenocarcinoma (COAD), esophageal carcinoma (ESCA), head and neck squamous cell carcinoma (HNSC), liver hepatocellular carcinoma (LIHC), lung squamous cell carcinoma (LUSC), prostate adenocarcinoma (PRAD), and stomach adenocarcinoma (STAD). FOXD1 expression was down-regulated in kidney renal clear cell carcinoma (KIRC), kidney renal papillary cell carcinoma (KIRP), thyroid carcinoma (THCA), and uterine corpus endometrial carcinoma (UCEC). Then, we used LinkedOmics tool to analyze the FOXD1-correlated genes (Supplementary Table S1) based on TCGA dataset and analyzed the GO functions and KEGG pathways with STRING database. The main GO functions and gene distributions, including biological process (BP), cell component (CC), and molecular function (MF), were shown in Figure 2B and Supplementary Table S2. The enrichment signal pathways were mainly distributed on proteoglycans in cancer, Rap1 signaling pathway, Ras signaling pathway, and T-cell receptor signaling pathway (Figure 2C).

### FOXD1 was up-regulated in HNSC patients

According to inclusion criteria, a total of 449 HNSC samples and 44 normal samples from TCGA database were finally included in the study. The clinical characteristics were list in Supplementary Table S3. Compared with normal tissues, FOXD1 expression was significantly up-regulated in HNSC tissues in TCGA dataset ( $P < 0.001$ , Figure 3A). To validate the result reliability, we also compared FOXD1 expression between paired HNSC tissues and adjacent normal tissues ( $n = 43$  pairs). FOXD1 was also up-regulated in HNSC tissues than normal tissues ( $P < 0.001$ , Supplementary Figure S1). Moreover, in GSE30784 dataset, FOXD1 expression in HNSC tissues was significantly higher than benign dysplasia and normal tissues ( $P < 0.001$ , Figure 3B).

Then, GEO datasets were as external validation. A total of 13 GEO datasets were included in the meta-analysis based on the inclusion criteria. These datasets were submitted from 2007 to 2020. FOXD1 expression in tumor tissues was significantly higher than normal tissues in GSE6631, GSE19089, GSE23558, GSE25099, GSE30784, GSE31056, GSE74530, GSE78060, and GSE85195 datasets (all  $P < 0.05$ , Figure 3C). Meta-analyses indicated that the pooled standard mean difference (SMD) of FOXD1 was 0.91 ( $P < 0.001$ , 95% CI: 0.47–1.35) using random-effects model, indicating that FOXD1 expression in HNSC was significantly higher than normal tissues. The funnel plot of SMD for the included studies appeared to be symmetric, and displayed no publication bias (Figure 3D).

### Association of FOXD1 expression and characteristics

In TCGA dataset, FOXD1 expression was significantly associated with tumor site ( $P = 0.010$ ) and HPV infection ( $P = 0.010$ ). But, FOXD1 expression was not associated with age ( $P = 0.354$ ), gender ( $P = 0.483$ ), distant metastasis ( $P = 0.205$ ), clinical stage ( $P = 0.189$ ), N stage ( $P = 0.496$ ), T stage ( $P = 0.081$ ), and grade ( $P = 0.572$ ) (Figure 4).

### Association of FOXD1 expression and clinical outcomes

In TCGA dataset, Kaplan–Meier curves showed that high FOXD1 expression was significantly correlated with poor OS (OS:  $P < 0.001$ , Figure 5A). GSE41613 and GSE65858 datasets were used as external validation. Although the difference was not significant in GSE41613 and GSE65858 datasets, high FOXD1 expression had a tendency of low OS (Figure 5B,C). Univariate and multivariate Cox regression analyses showed that FOXD1 expression was an independent prognostic factor for OS ( $P = 0.001$ , Table 2). According to the result of multivariate Cox regression, the

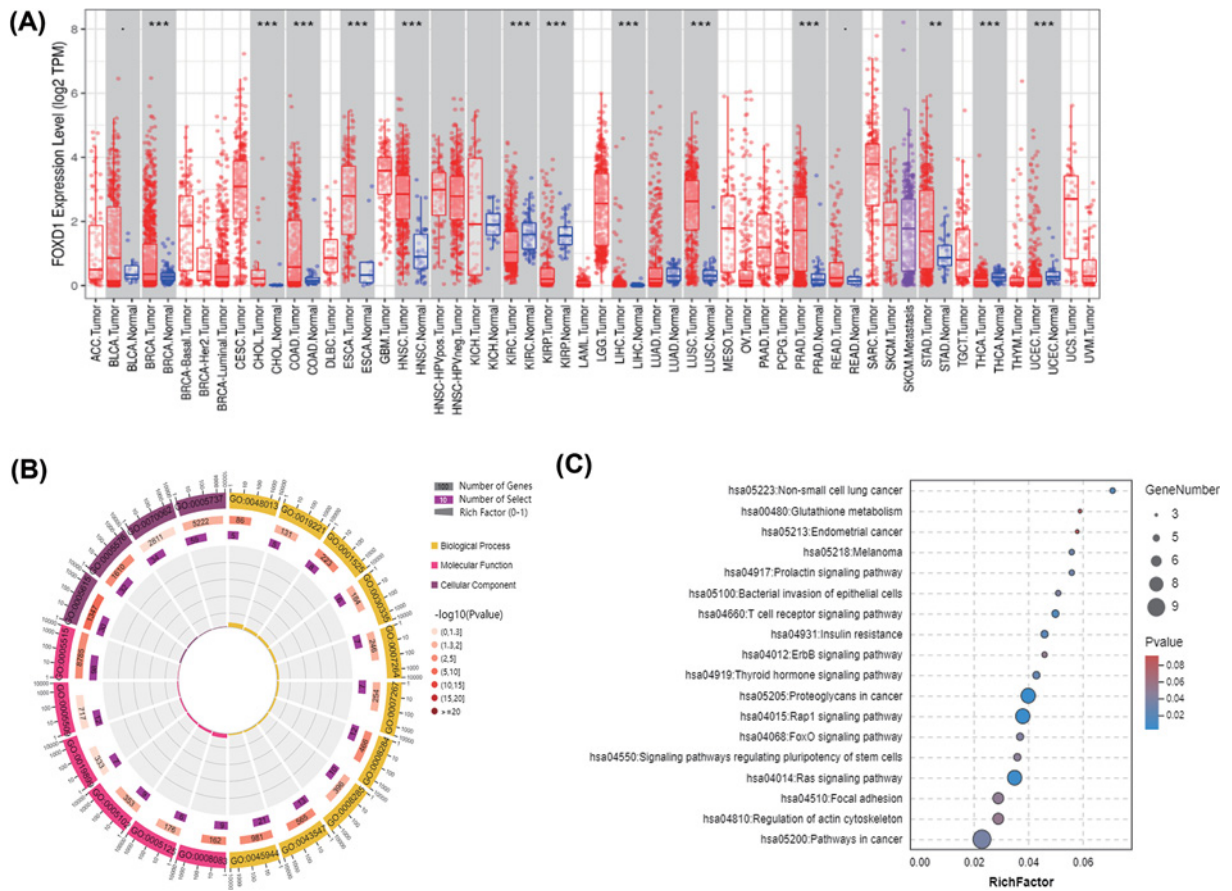

**Figure 2. Pan-cancer analyses of FOXD1 expression and functions of FOXD1-correlated genes in HNSC**

**(A)** Pan-cancer analyses of FOXD1 expression using TIMER online tool. **(B)** BPs, CCs, and MFs of FOXD1-correlated genes based on TCGA dataset through STRING database. BPs: GO:0045944, positive regulation of transcription from RNA polymerase II promoter; GO:0043547, positive regulation of GTPase activity; GO:0008284, positive regulation of cell proliferation; GO:0008285, negative regulation of cell proliferation; GO:0001525, angiogenesis; GO:0007264, small GTPase-mediated signal transduction; GO:0007267, cell-cell signaling; GO:0030335, positive regulation of cell migration; GO:0000165, MAPK cascade; GO:0048013, ephrin receptor signaling pathway; GO:0019221, cytokine-mediated signaling pathway. CCs: GO:0005737, cytoplasm; GO:0070062, extracellular exosome; GO:0005576, extracellular region; GO:0005615, extracellular space. MFs: GO:0005515, protein binding; GO:0005509, calcium ion binding; GO:0008083, growth factor activity; GO:0005102, receptor binding; GO:0019899, enzyme binding; GO:0005125 cytokine activity. **(C)** KEGG pathways of FOXD1-correlated genes in HNSC through STRING database. \*  $P$ -value < 0.05, \*\*  $P$ -value < 0.01, \*\*\*  $P$ -value < 0.001.

**Table 2 Univariate and multivariate Cox regression analyses of FOXD1 in TCGA HNSC dataset**

| Parameters       | Univariate analysis |              |         | Multivariate analysis |              |         |
|------------------|---------------------|--------------|---------|-----------------------|--------------|---------|
|                  | HR                  | 95% CI       | P-value | HR                    | 95% CI       | P-value |
| Age              | 1.259               | 0.952–1.665  | 0.106   |                       |              |         |
| Gender           | 0.787               | 0.585–1.060  | 0.115   |                       |              |         |
| Metastasis       | 4.516               | 1.663–12.265 | 0.003   | 5.947                 | 2.154–16.423 | 0.001   |
| Clinical stage   | 1.115               | 0.952–1.306  | 0.176   |                       |              |         |
| N stage          | 1.178               | 1.013–1.370  | 0.033   |                       |              |         |
| T stage          | 1.097               | 0.948–1.269  | 0.216   | 1.165                 | 1.002–1.353  | 0.046   |
| Grade            | 1.088               | 0.879–1.346  | 0.437   |                       |              |         |
| Tumor site       | 0.899               | 0.651–1.242  | 0.520   |                       |              |         |
| FOXD1 expression | 1.608               | 1.216–2.1285 | 0.001   | 1.711                 | 1.287–2.275  | <0.001  |

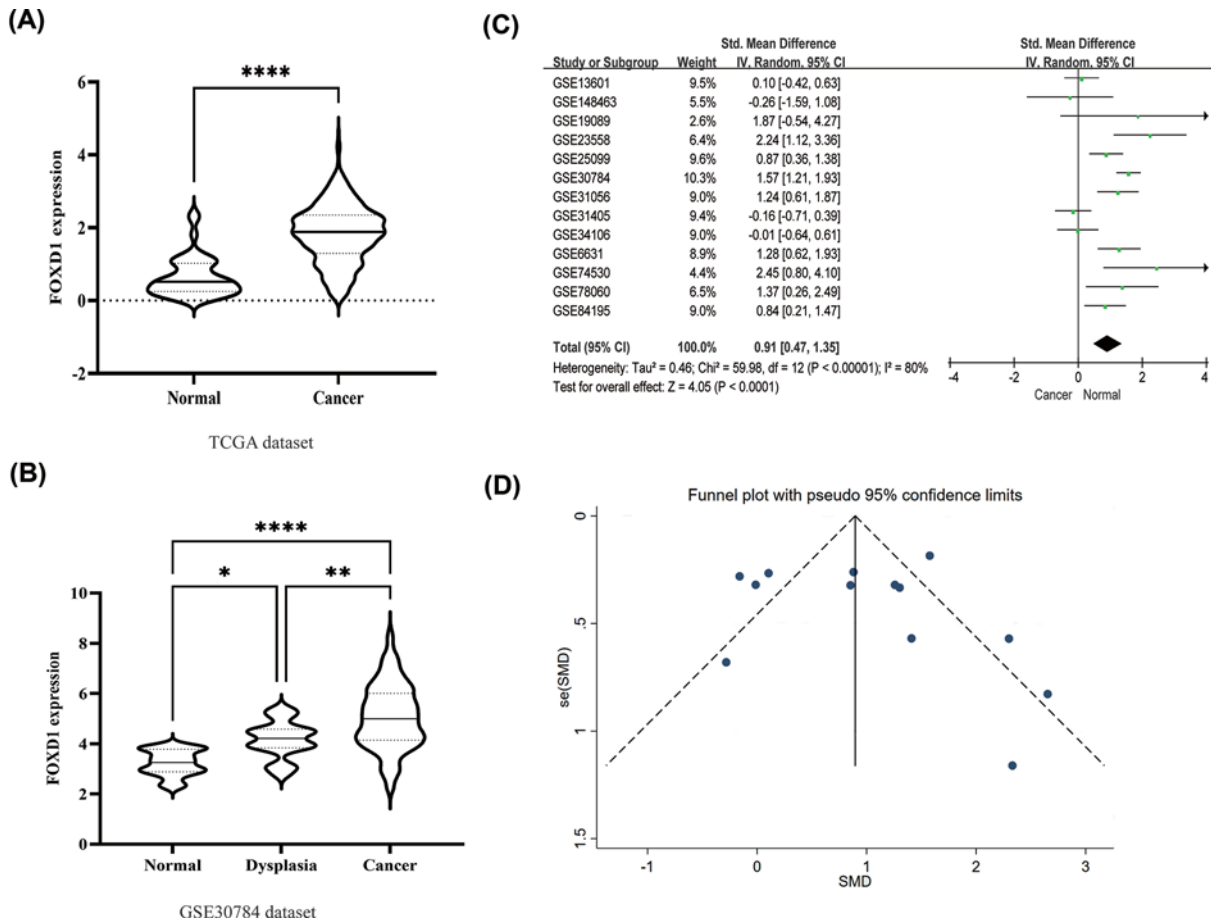

**Figure 3. FOXD1 expression in HNSC tissues**

(A) FOXD1 expression in TCGA dataset. (B) FOXD1 expression among HNSC, dysplasia, and normal tissues in GSE30784 dataset. (C) Comparisons of FOXD1 expression between HNSC and normal tissues evaluated by forest-plot based on data from 13 GEO datasets. The random-effects model was adopted due to high heterogeneity ( $I^2 = 80.0\%$ ,  $P < 0.001$ ) for the included studies. The overall standard mean difference (SMD) was 0.91 (95% CI = 0.47–1.35), indicating that FOXD1 expression in HNSC tissues was significantly higher than normal tissues (D) The funnel plot of SMD for the included studies, indicating no publication bias.  $P < 0.05$  represented statistical significance. \*  $P$ -value  $< 0.05$ , \*\*  $P$ -value  $< 0.01$ , \*\*\*\*  $P$ -value  $< 0.0001$ .

nomograms were generated to predict the 3- and 5-year OS probabilities, respectively. We introduced three independent factors into the nomogram for OS, including distant metastasis, T stage and FOXD1 expression, and each factor was assigned a score in proportion to its contribution to the risk of survival, thus obtaining the corresponding predicted survival rate (Figure 5D). The C-index of OS prediction was 0.62. Calibration of the nomograms displayed good agreement between the predicted 3- and 5-year OS rates and actual observations (Figure 5E,F).

## Relationship between FOXD1 expression and TME

To understand the immune characteristics of FOXD1, ESTIMATE was applied to calculate the stromal score and immune score in 449 HNSC patients. We found that stromal scores and immune scores displayed no significant difference between high- and low-FOXD1 expression groups ( $P > 0.05$ , Figure 6A). Then, the gene expression matrix of the HNSC dataset was analyzed using CIBERSORT algorithm to estimate the proportions of 22 immune infiltrating cells (Figure 6B). The proportions of naïve B cells ( $P = 0.023$ ), plasma cells ( $P = 0.019$ ), and resting dendritic cells (DCs) ( $P = 0.018$ ) in high FOXD1 expression were significantly lower than low FOXD1 expression group, while the proportion of activated mast cells in high FOXD1 expression group was significantly higher than low FOXD1 expression group ( $P = 0.014$ ). Moreover, we found that the proportions of naïve B cells ( $r = -0.141$ ,  $P = 0.006$ , Figure 6C), plasma cells ( $r = -0.170$ ,  $P = 0.001$ , Figure 6D), and resting DCs ( $r = -0.118$ ,  $P = 0.020$ , Figure 6E) were negatively

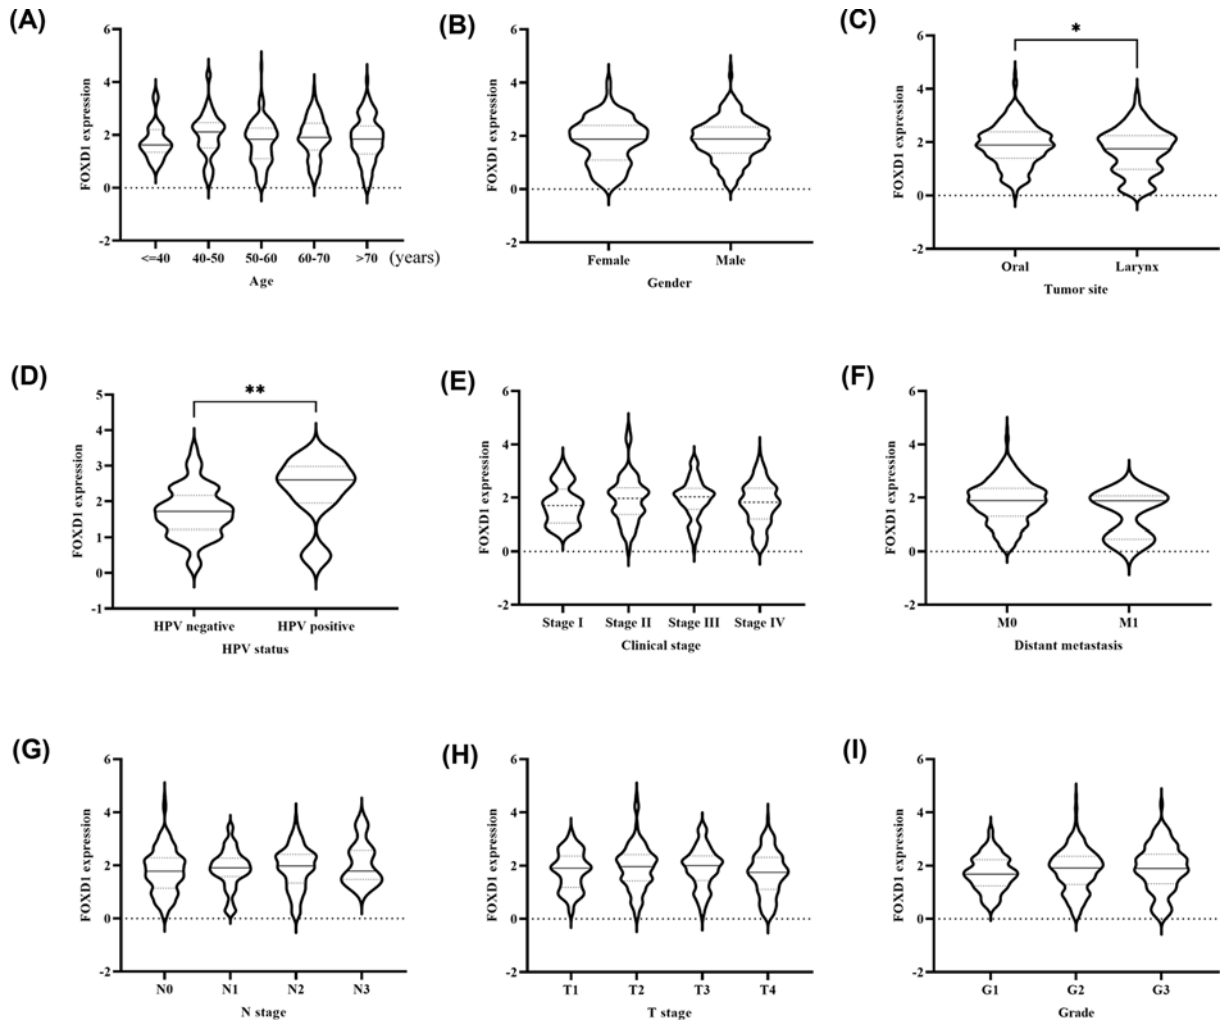

**Figure 4. Correlation of *FOXD1* expression and clinical parameters**

(A) Age; (B) gender; (C) tumor sites; (D) HPV infection; (E) clinical stages; (F) distant metastasis; (G) N stage; (H) T stage; (I) Grade.  $P < 0.05$  represented statistical significance. \*  $P$ -value  $< 0.05$ , \*\*  $P$ -value  $< 0.01$ .

correlated with *FOXD1* expression, otherwise, the proportion of activated mast cells was positively correlated with *FOXD1* expression ( $r = 0.189$ ,  $P < 0.001$ , Figure 6F).

## GSEAs

*FOXD1*-related signaling pathways were analyzed between high- and low-*FOXD1* expression phenotypes through GSEAs. We list the top ten up-regulated signal pathways in the high-expression group of *FOXD1*, including metabolism of xenobiotics by cytochrome P450, arachidonic acid metabolism, steroid hormone biosynthesis, PPAR signaling pathway, cell adhesion molecule (Figure 7A). Moreover, the biological functions were enriched in keratinocyte differentiation, epidermal cell differentiation, complement activation, B-cell receptor signaling pathway, humoral immune response mediated by circulating immunoglobulin in high *FOXD1* phenotype (Figure 7B).

## *FOXD1* expression in cell lines and clinical samples

To further validate the mRNA expression of *FOXD1*, we assessed the expression levels of *FOXD1* in HNSC cell lines by qRT-PCR. The mRNA levels of *FOXD1* were significantly higher in SCC-9 and CAL-27 cell lines compared with those of HOEC cell line (Figure 8A). *FOXD1* protein levels were also significantly up-regulated in SCC-9 cell lines (Figure 8B,C). Moreover, *FOXD1* expression in HNSC occurred mainly in the nucleus, and *FOXD1* expression was significantly increased in cancer tissues compared with corresponding adjacent normal tissues (Figure 8D).



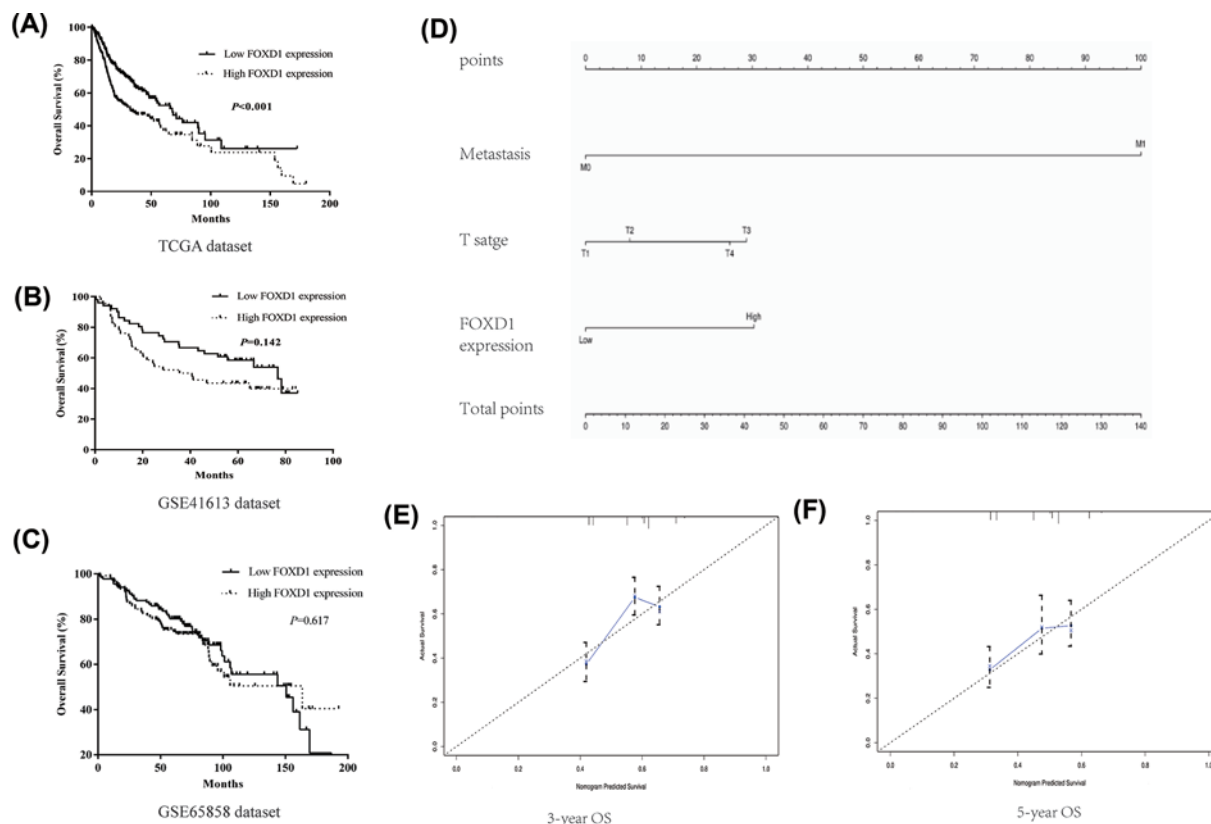

**Figure 5. Prognostic analyses of *FOXD1* expression in HNSC patients**

(A) Kaplan–Meier curve of *FOXD1* expression in TCGA dataset. (B) Kaplan–Meier curve of *FOXD1* expression in GSE41613 dataset. (C) Kaplan–Meier curve of *FOXD1* expression in GSE65858 dataset. (D) Nomogram of OS predicting in HNSC patients. (E,F) The 3- and 5-year calibration curves for consistency validation of the nomogram.

## Discussion

FOX family is an important and complex gene family, comprising diverse cell- and tissue-specific ‘winged-helix’ transcriptional factors [16]. Previous studies demonstrate that FOX family members participate in DNA damage repair, cell proliferation, differentiation, metabolism, apoptosis, tissue homeostasis, and development of immune system [17]. As a consequence, the alterations of FOX expression can influence the tumorigenesis as well as cancer progression. To date, several key FOX gene subfamilies, such as FOXA, FOXC, FOXM, FOXO and FOXP, have been found to be strongly linked to cancer initiation, invasion, metastasis, and drug resistance [18–21]. In the present study, we found that *FOXD1* was up-regulated in HNSC tissues at both mRNA and protein levels, and significantly associated with primary tumor site and HPV infection. Moreover, *FOXD1* expression was significantly correlated with OS in HNSC patients. In order to explore the function and molecular mechanism of *FOXD1*, we analyzed the correlation of *FOXD1* expression and TME, and found that naïve B cells, plasma cells, resting DCs, and activated mast cells were significantly different between low- and high-*FOXD1* expression groups. Moreover, GSEA revealed that *FOXD1* was mainly involved in cancer-related signaling pathway and metabolism-related pathways.

The biological function of *FOXD1* in human cancers has not been completely explored. *FOXD1*, as a newly discovered FOX family transcriptional factor, played a controversial role in varied cancer types. Some studies suggested that *FOXD1* was involved in carcinogenesis and functioned as a tumor promoter in many cancer types [8]. Overexpression of *FOXD1* could enhance the ability of cell proliferation and chemoresistance in MCF-7 breast cells, whereas silencing of *FOXD1* expression attenuate cell proliferation and chemoresistance in MDA-231 cells [10]. Zhang et al. reported that *FOXD1*, as a novel oncogene, promoted the proliferation, migration, invasion, and radio-resistance in nasopharyngeal carcinoma cells [11]. In colorectal cancer patients, *FOXD1* expression was up-regulated and correlated with more invasive phenotype, such as lymphatic metastasis and TNM stage [8]. Tao et al. demonstrated that

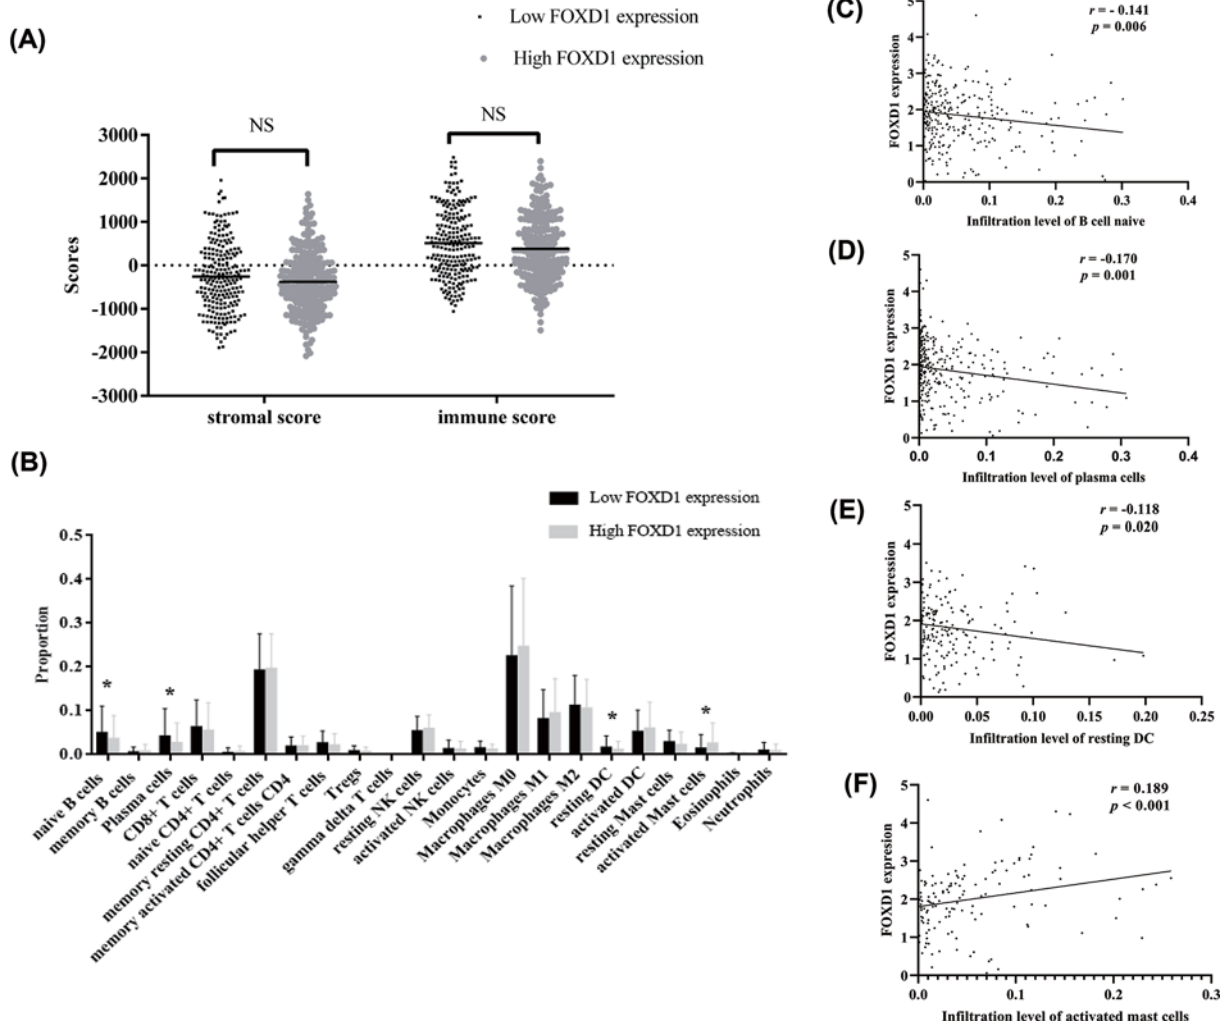

**Figure 6. Correlation of *FOXD1* expression and TME and immune cell infiltration in HNSC**

(A) Correlation between *FOXD1* expression and stromal scores and immune scores between high- and low-*FOXD1* expression groups using ESTIMATE algorithm. (B) The proportions of immune cell subtypes between high- and low-*FOXD1* expression groups using CIBERSORT algorithm. (C–F) Correlations of naïve B cell, plasma cells, resting DC and activated mast cells, and *FOXD1* expression in HNSC samples.  $P < 0.05$  represented statistical significance. \*  $P$ -value  $< 0.05$ .

inhibitor of *FOXD1* suppressed cell proliferation, migration and invasion in osteosarcoma cells, while overexpression of *FOXD1* promoted osteosarcoma cell proliferation and migration [22]. In prostate cancer, down-regulation of *FOXD1* affected the expression of cell cycle control genes and suppressed the androgen-independent growth of 22RV1 cells [13]. However, another study in ovarian cancer indicated that up-regulated *FOXD1* could inhibit cell proliferation by inducing cell cycle arrest at G<sub>1</sub> phase in ovarian cancer cells, and high *FOXD1* expression was significantly correlated with favorable prognosis [9]. The results obtained from breast cancer, lung cancer, nasopharyngeal carcinoma, colorectal cancer and prostate cancer are evident, but, the function of *FOXD1* in ovarian cancer remain controversial. We performed a pan-cancer analysis for *FOXD1* at mRNA levels, and found that *FOXD1* was up-regulated in BRCA, CHOL, COAD, ESCA, HNSC, LIHC, LUSC, PRAD and STAD, and down-regulated in KIRC, KIRP, THCA and UCEC. Due to non-available data of normal tissues, there was no comparison in ovarian carcinoma (OV). In view of the up-regulation of *FOXD1* at mRNA levels in TCGA HNSC samples, we validated the *FOXD1* expression in TCGA and GEO datasets. Thus, we speculated that *FOXD1* was a tumor promoter in HNSC. Similar with our result, a recent study reported that *FOXD1* up-regulation was related to metastasis and poor clinical outcomes in oral squamous carcinoma [23]. Lin et al. also found that *FOXD1* knockdown dramatically suppressed the colony-forming ability and conferred radioresistance by down-regulating the JAK-STAT pathway in oral cancer cells

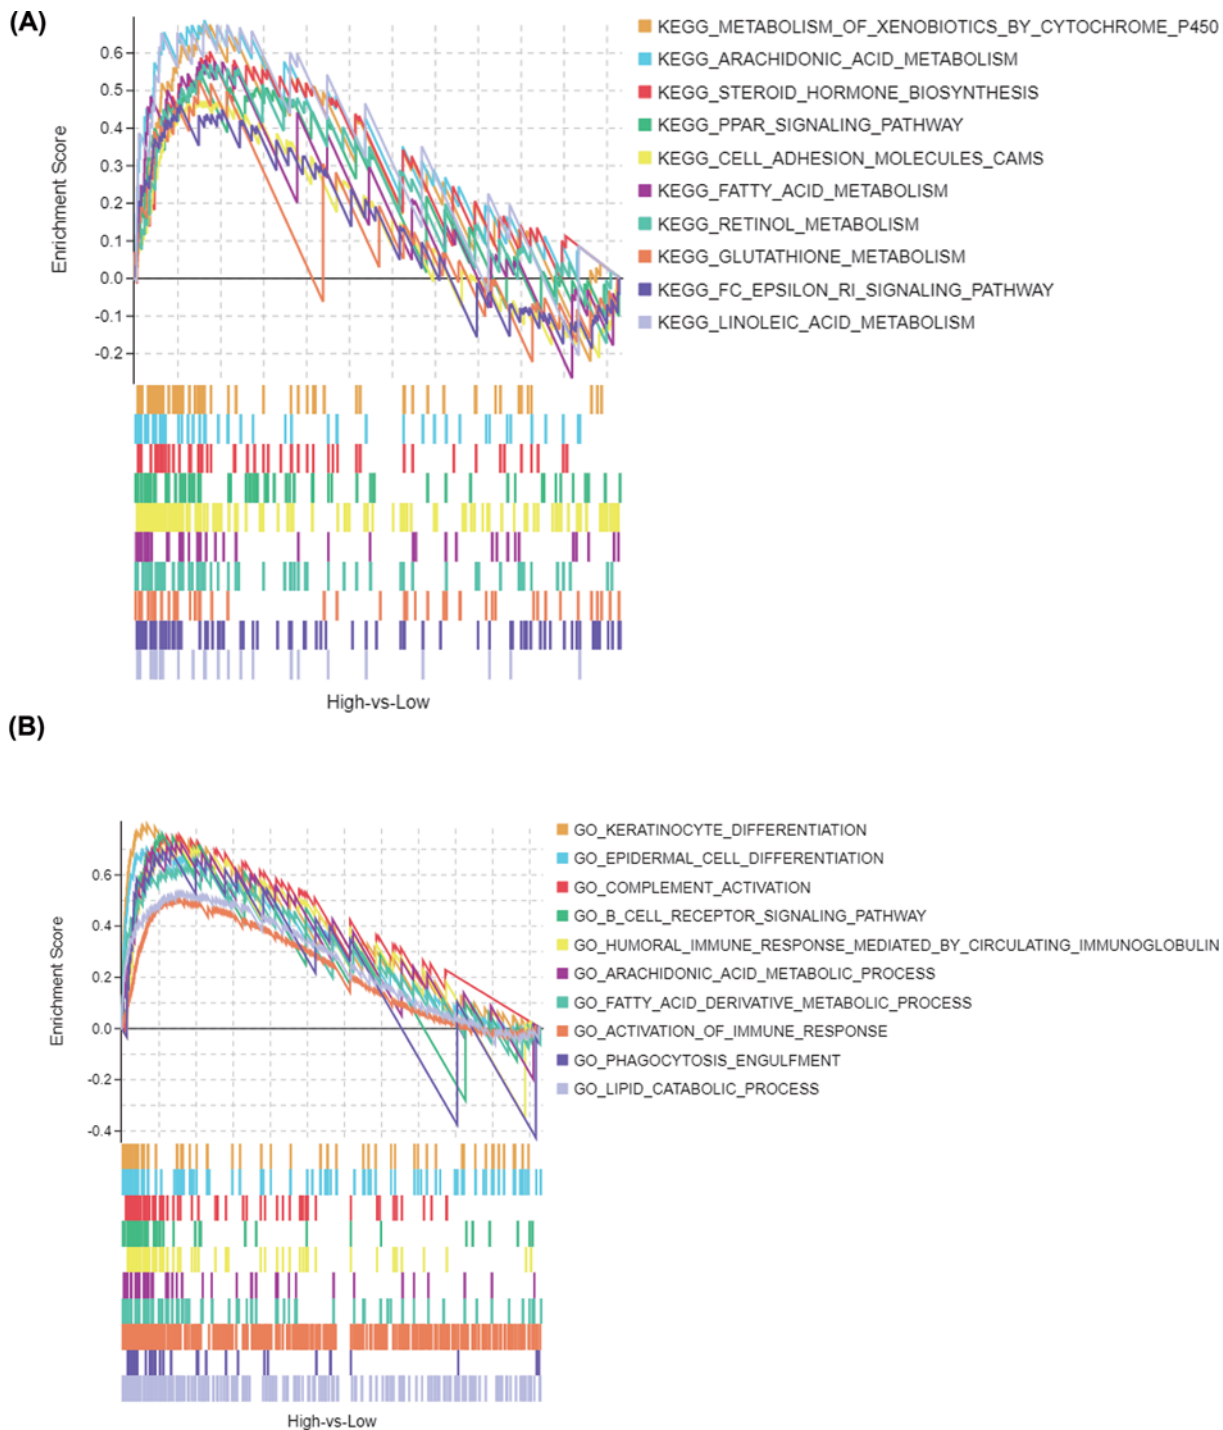

**Figure 7. GSEA between high- and low- *FOXD1* expression phenotypes**  
(A) KEGG pathways. (B) BPs.

[24]. In the present study, we found that mRNA and protein levels of *FOXD1* was up-regulated in HNSC cell lines, and *FOXD1* expression was increased in cancer tissues compared with corresponding adjacent normal tissues.

In the last decade, it is clear that FOX family members have potential roles in various aspects of immune regulation, immune homeostasis, and development and differentiation of immune cells [25,26]. FOXO subfamily members participated in the DC activity, CD8<sup>+</sup> T-cell response, and macrophage activation [27]. FOXJ1 restrains B-cell activation and the maturation of humoral responses to regulate B lymphocyte homeostasis [28]. FOXP1 repressed immune

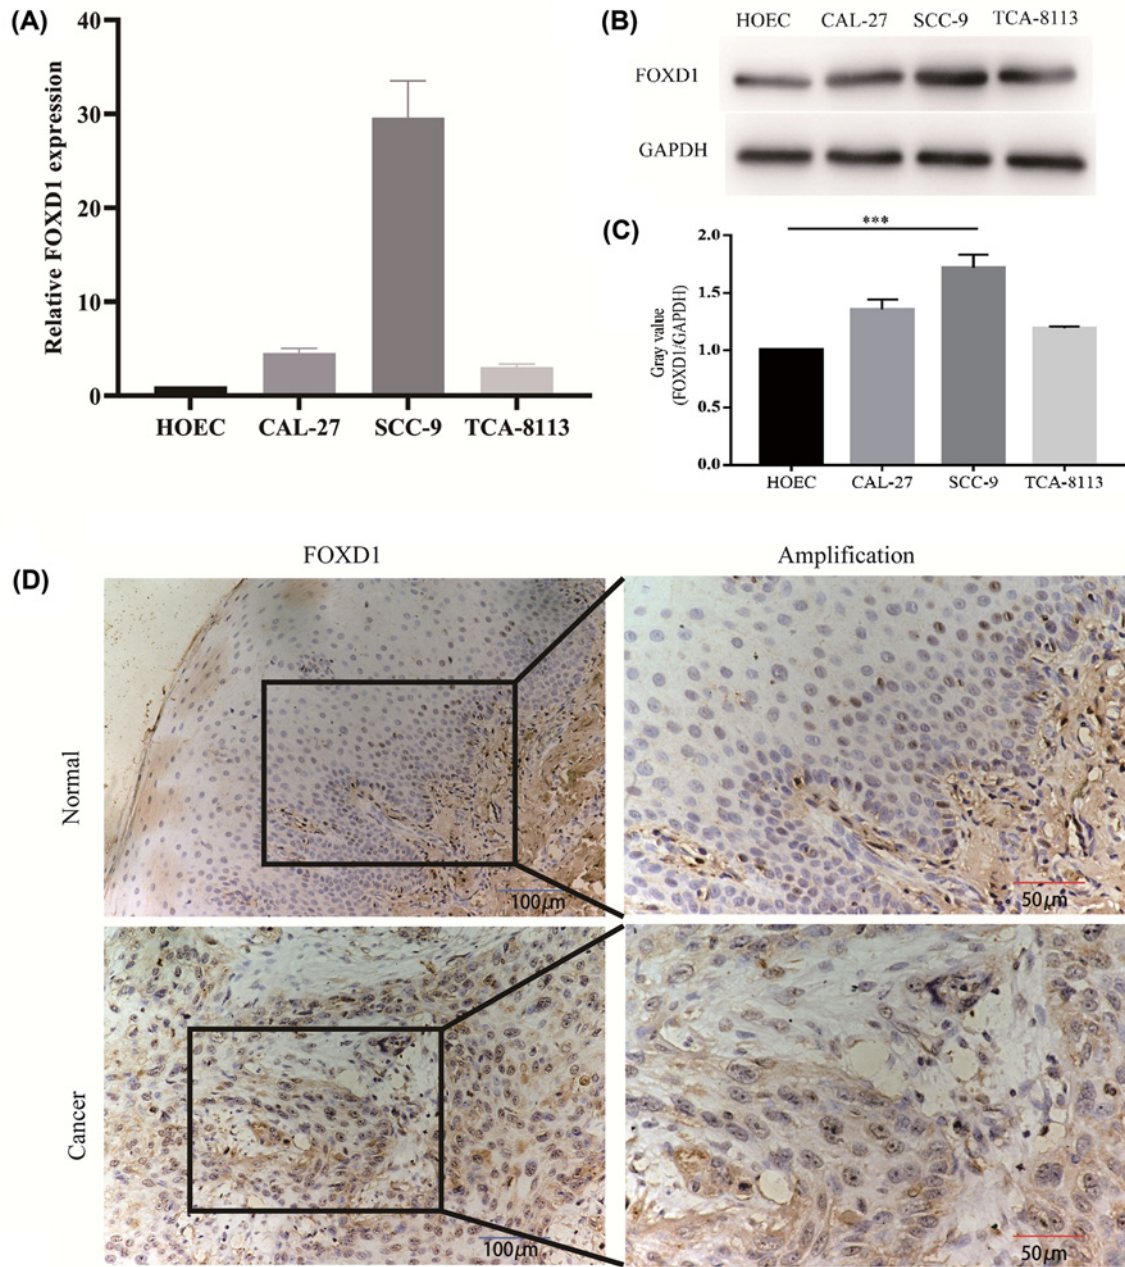

**Figure 8. GSEA between high- and low-*FOXD1* expression phenotypes**

(A) Relative FOXD1 mRNA levels in HOEC, CAL-27, SCC-9 and TCA-8113 cell lines. (B) Western blot of FOXD1 protein expression in HOEC, CAL-27, SCC-9 and TCA-8113 cell lines. (C) Histogram of FOXD1 expression levels in HOEC, CAL-27, SCC-9 and TCA-8113 cell lines. (D) FOXD1 expression in HNSC tissue samples and corresponding non-cancer tissue samples. \*\*\*  $P$ -value < 0.001.

signaling in the central nervous system and contributed to the immune dysfunction in central nervous system development [29]. FOXP3, a molecular marker of Tregs, is highly expressed in lymphoid tissue, and plays a key role in the development and function of Treg cells, representing an important therapeutic target for cancer [30]. FOXP1 is indispensable for thymic epithelial cell differentiation, growth, function, and thymic epithelium cell homeostasis [31,32]. However, the immune function of FOXD1 is little known and its role in TME has not been fully elucidated yet. Lin et al. reported that *Foxd1* coordinated the regulation of the activity of NF-AT and NF- $\kappa$ B, and FOXD1 deficiency could result in multiorgan and systemic inflammation, and exaggerated Th cell-derived cytokine production

and T-cell proliferation [33]. HNSC is an immunosuppressive disease, which is characteristic of decreased lymphocyte counts [34], impaired natural killer (NK) cell activity [35], down-regulated antigen-presenting function [36], and abnormality of tumor-infiltrating T lymphocytes [37]. Our results suggested that immune score decreased in HNSC tissues, although the difference was not significant ( $P=0.067$ ). Moreover, we adopt CIBERSORT algorithms to analyze the proportions of immune cell subtypes and found that the naïve B cells, plasma cells, and resting DCs were significantly decreased with *FOXD1* expression increase. Wouters et al. searched Pubmed database, covering 69 studies and 19 cancer types, and provided the evidence to support a positive role for B cells and plasma cells in anti-tumor immunity [38]. Moreover, the preoperative DC counts and DC surface molecular expression were impaired in HNSC patients in comparison with healthy controls [39]. Furthermore, we investigated the correlation of *FOXD1* expression and changed immune cells, and we found that the proportions of naïve B cells, plasma cells, and resting DCs were negatively correlated with *FOXD1* expression; otherwise, the proportion of activated mast cells was positively correlated with *FOXD1* expression.

However, our study has some limitation. First, the study was mainly based on TCGA and GEO datasets to investigate the prognostic value of *FOXD1*, while histological validation was conducted only in a few patients without completed follow-up information. Second, *in vivo* function experiments were lacking. Third, we analyzed the *FOXD1*-related pathways through GSEA, and there was a lack of relevant mechanism research.

## Conclusion

Taken together, we identified that up-regulation of *FOXD1* was a potential prognostic marker in HNSC, and was associated with HPV status and HNSC sites. Moreover, *FOXD1* expression played an important role in TME and immune cell infiltration. Hence, further studies are required to validate the role of *FOXD1* in HNSC and to improve the understanding of the underlying mechanisms.

## Data Availability

The datasets generated and analyzed during the current study are available from the TCGA and GEO database, and the data presented in this manuscript are available from the corresponding author on reasonable request.

## Competing Interests

The authors declare that there are no competing interests associated with the manuscript.

## Funding

This work was supported by the National Natural Science Foundation of China [grant number 81301835].

## Author Contribution

T.j.W. and B.L. conceived and designed the experiments. B.L. and J.j.H. analyzed the data. T.j.W. and B.L. wrote the drafts of the paper, and T.j.W. approved the final draft.

## Ethics Approval

The present study was approved by the Ethics Committee of China Medical University. All study involving human participants were in accordance with the Declaration of Helsinki.

## Acknowledgements

We would like to thank TCGA and GEO database for sharing the data with the public.

## Abbreviations

BRCA, breast invasive carcinoma; CHOL, cholangiocarcinoma; CIBERSORT, Cell-type Identification By Estimating Relative Subsets Of known RNA Transcripts; COAD, colon adenocarcinoma; C-index, concordance index; DC, dendritic cell; ESCA, esophageal carcinoma; ESTIMATE, Estimation of STromal and Immune cells in MAlignant Tumor tissues using Expression data; *FOXD1*, Forkhead box D1; GEO, Gene Expression Omnibus; GO, gene ontology; GSEA, Gene Set Enrichment Analysis; HNC, head and neck cancer; HNSC, head and neck squamous cancer; HPV, human papillomavirus; KEGG, Kyoto Encyclopedia of Genes and Genomes; KIRC, kidney renal clear cell carcinoma; KIRP, kidney renal papillary cell carcinoma; LIHC, liver hepatocellular carcinoma; LUSC, lung squamous cell carcinoma; NF-AT, nuclear factor of activated T cells; OS, overall survival; PPAR

, peroxisome proliferator-activated receptor; STAD, stomach adenocarcinoma; TCGA, The Cancer Genome Atlas; THCA, thyroid carcinoma; TME, tumor microenvironment; TNM, tumor, nodes, metastasis; Treg, regulatory T cells; UCEC, uterine corpus endometrial carcinoma.

## References

- Torre, L.A., Bray, F., Siegel, R.L., Ferlay, J., Lortet-Tieulent, J. and Jemal, A. (2015) Global cancer statistics, 2012. *CA Cancer J. Clin.* **65**, 87–108, <https://doi.org/10.3322/caac.21262>
- Siegel, R.L., Miller, K.D. and Jemal, A. (2018) Cancer statistics, 2018. *CA Cancer J. Clin.* **68**, 7–30, <https://doi.org/10.3322/caac.21442>
- Levinson, R.S., Batourina, E., Choi, C., Vorontchikhina, M., Kitajewski, J. and Mendelsohn, C.L. (2005) Foxd1-dependent signals control cellularity in the renal capsule, a structure required for normal renal development. *Development* **132**, 529–539, <https://doi.org/10.1242/dev.01604>
- Koga, M., Matsuda, M., Kawamura, T., Sogo, T., Shigeno, A., Nishida, E. et al. (2014) Foxd1 is a mediator and indicator of the cell reprogramming process. *Nat. Commun.* **5**, 3197, <https://doi.org/10.1038/ncomms4197>
- Lin, E.E., Sequeira-Lopez, M.L. and Gomez, R.A. (2014) RBP-J in FOXD1+ renal stromal progenitors is crucial for the proper development and assembly of the kidney vasculature and glomerular mesangial cells. *Am. J. Physiol. Renal Physiol.* **306**, F249–F258, <https://doi.org/10.1152/ajprenal.00313.2013>
- Herrera, E., Marcus, R., Li, S., Williams, S.E., Erskine, L., Lai, E. et al. (2004) Foxd1 is required for proper formation of the optic chiasm. *Development* **131**, 5727–5739, <https://doi.org/10.1242/dev.01431>
- Li, D., Fan, S., Yu, F., Zhu, X., Song, Y., Ye, M. et al. (2018) FOXD1 promotes cell growth and metastasis by activation of vimentin in NSCLC. *Cell. Physiol. Biochem.* **51**, 2716–2731, <https://doi.org/10.1159/000495962>
- Pan, F., Li, M. and Chen, W. (2018) FOXD1 predicts prognosis of colorectal cancer patients and promotes colorectal cancer progression via the ERK 1/2 pathway. *Am. J. Transl. Res.* **10**, 1522–1530
- Wang, Y., Qiu, C., Lu, N., Liu, Z., Jin, C., Sun, C. et al. (2018) FOXD1 is targeted by miR-30a-5p and miR-200a-5p and suppresses the proliferation of human ovarian carcinoma cells by promoting p21 expression in a p53-independent manner. *Int. J. Oncol.* **52**, 2130–2142, <https://doi.org/10.3892/ijo.2018.4359>
- Zhao, Y.F., Zhao, J.Y., Yue, H., Hu, K.S., Shen, H., Guo, Z.G. et al. (2015) FOXD1 promotes breast cancer proliferation and chemotherapeutic drug resistance by targeting p27. *Biochem. Biophys. Res. Commun.* **456**, 232–237, <https://doi.org/10.1016/j.bbrc.2014.11.064>
- Zhang, Y. and Zhang, W. (2020) FOXD1, negatively regulated by miR-186, promotes the proliferation, metastasis and radioresistance of nasopharyngeal carcinoma cells. *Cancer Biomark* **28**, 511–521, <https://doi.org/10.3233/CBM-191311>
- Wu, Q., Ma, J., Wei, J., Meng, W., Wang, Y. and Shi, M. (2020) FOXD1-AS1 regulates FOXD1 translation and promotes gastric cancer progression and chemoresistance by activating the PI3K/AKT/mTOR pathway. *Mol. Oncol.* **15**, 299–316, <https://doi.org/10.1002/1878-0261.12728>
- Li, X., Jiao, M., Hu, J., Qi, M., Zhang, J., Zhao, M. et al. (2020) miR-30a inhibits androgen-independent growth of prostate cancer via targeting MYBL2, FOXD1, and SOX4. *Prostate* **80**, 674–686, <https://doi.org/10.1002/pros.23979>
- Gao, Y.F., Zhu, T., Mao, X.Y., Mao, C.X., Li, L., Yin, J.Y. et al. (2017) Silencing of Forkhead box D1 inhibits proliferation and migration in glioma cells. *Oncol. Rep.* **37**, 1196–1202, <https://doi.org/10.3892/or.2017.5344>
- Hartmann, S., Bholra, N.E. and Grandis, J.R. (2016) HGF/Met signaling in head and neck cancer: impact on the tumor microenvironment. *Clin. Cancer Res.* **22**, 4005–4013, <https://doi.org/10.1158/1078-0432.CCR-16-0951>
- Lam, E.W., Brosens, J.J., Gomes, A.R. and Koo, C.Y. (2013) Forkhead box proteins: tuning forks for transcriptional harmony. *Nat. Rev. Cancer* **13**, 482–495, <https://doi.org/10.1038/nrc3539>
- Katoh, M., Igarashi, M., Fukuda, H., Nakagama, H. and Katoh, M. (2013) Cancer genetics and genomics of human FOX family genes. *Cancer Lett.* **328**, 198–206, <https://doi.org/10.1016/j.canlet.2012.09.017>
- Koo, C.Y., Muir, K.W. and Lam, E.W. (2012) FOXM1: From cancer initiation to progression and treatment. *Biochim. Biophys. Acta* **1819**, 28–37, <https://doi.org/10.1016/j.bbagr.2011.09.004>
- Golson, M.L. and Kaestner, K.H. (2016) Fox transcription factors: from development to disease. *Development* **143**, 4558–4570, <https://doi.org/10.1242/dev.112672>
- Bach, D.H., Long, N.P., Luu, T.T., Anh, N.H., Kwon, S.W. and Lee, S.K. (2018) The dominant role of forkhead box proteins in cancer. *Int. J. Mol. Sci.* **19**, 3279, <https://doi.org/10.3390/ijms19103279>
- Laissue, P. (2019) The forkhead-box family of transcription factors: key molecular players in colorectal cancer pathogenesis. *Mol. Cancer* **18**, 5, <https://doi.org/10.1186/s12943-019-0938-x>
- Tao, J., Cong, H., Wang, H., Zhang, D., Liu, C., Chu, H. et al. (2018) MiR-30a-5p inhibits osteosarcoma cell proliferation and migration by targeting FOXD1. *Biochem. Biophys. Res. Commun.* **503**, 1092–1097, <https://doi.org/10.1016/j.bbrc.2018.06.121>
- Li, Z., Yan, T., Wu, X., Zhang, W., Li, J., Wang, L. et al. (2020) Increased expression of FOXD1 is associated with cervical nodes metastasis and unfavorable prognosis in oral squamous cell carcinoma. *J. Oral Pathol. Med.* **49**, 1030–1036, <https://doi.org/10.1111/jop.13098>
- Lin, C.H., Lee, H.H., Chang, W.M., Lee, F.P., Chen, L.C., Lu, L.S. et al. (2020) FOXD1 repression potentiates radiation effectiveness by downregulating G3BP2 expression and promoting the activation of TXNIP-related pathways in oral cancer. *Cancers (Basel)* **12**, 2690, <https://doi.org/10.3390/cancers12092690>
- Zaiss, D.M.W. and Coffer, P.J. (2018) Forkhead box transcription factors as context-dependent regulators of lymphocyte homeostasis. *Nat. Rev. Immunol.* **18**, 703–715, <https://doi.org/10.1038/s41577-018-0048-9>
- Skinner, J., Greene, R.A. and Stuart, B. (1997) Puerperal ovarian vein thrombosis in a triplet pregnancy complicated by a single intrauterine death. *J. Obstet. Gynecol.* **17**, 585, <https://doi.org/10.1080/01443619768704>

- 27 Cabrera-Ortega, A.A., Feinberg, D., Liang, Y., Rossa, Jr, C. and Graves, D.T. (2017) The role of forkhead box 1 (FOXO1) in the immune system: dendritic cells, T cells, B cells, and hematopoietic stem cells. *Crit. Rev. Immunol.* **37**, 1–13, <https://doi.org/10.1615/CritRevImmunol.2017019636>
- 28 Lin, L., Brody, S.L. and Peng, S.L. (2005) Restraint of B cell activation by Foxj1-mediated antagonism of NF-kappa B and IL-6. *J. Immunol.* **175**, 951–958, <https://doi.org/10.4049/jimmunol.175.2.951>
- 29 Tang, B., Becanovic, K., Desplats, P.A., Spencer, B., Hill, A.M., Connolly, C. et al. (2012) Forkhead box protein p1 is a transcriptional repressor of immune signaling in the CNS: implications for transcriptional dysregulation in Huntington disease. *Hum. Mol. Genet.* **21**, 3097–3111, <https://doi.org/10.1093/hmg/dds132>
- 30 Nik Tavakoli, N., Hambly, B.D., Sullivan, D.R. and Bao, S. (2008) Forkhead box protein 3: essential immune regulatory role. *Int. J. Biochem. Cell Biol.* **40**, 2369–2373, <https://doi.org/10.1016/j.biocel.2007.10.004>
- 31 Zuklys, S., Handel, A., Zhanybekova, S., Govani, F., Keller, M., Maio, S. et al. (2016) Foxn1 regulates key target genes essential for T cell development in postnatal thymic epithelial cells. *Nat. Immunol.* **17**, 1206–1215, <https://doi.org/10.1038/ni.3537>
- 32 Zhang, Z., Burnley, P., Coder, B. and Su, D.M. (2012) Insights on FoxN1 biological significance and usages of the “nude” mouse in studies of T-lymphopoiesis. *Int. J. Biol. Sci.* **8**, 1156–1167, <https://doi.org/10.7150/ijbs.5033>
- 33 Lin, L. and Peng, S.L. (2006) Coordination of NF-kappaB and NFAT antagonism by the forkhead transcription factor Foxd1. *J. Immunol.* **176**, 4793–4803, <https://doi.org/10.4049/jimmunol.176.8.4793>
- 34 Kuss, I., Hathaway, B., Ferris, R.L., Gooding, W. and Whiteside, T.L. (2004) Decreased absolute counts of T lymphocyte subsets and their relation to disease in squamous cell carcinoma of the head and neck. *Clin. Cancer Res.* **10**, 3755–3762, <https://doi.org/10.1158/1078-0432.CCR-04-0054>
- 35 Dasgupta, S., Bhattacharya-Chatterjee, M., O'Malley, Jr, B.W. and Chatterjee, S.K. (2005) Inhibition of NK cell activity through TGF-beta 1 by down-regulation of NKG2D in a murine model of head and neck cancer. *J. Immunol.* **175**, 5541–5550, <https://doi.org/10.4049/jimmunol.175.8.5541>
- 36 Ferris, R.L., Whiteside, T.L. and Ferrone, S. (2006) Immune escape associated with functional defects in antigen-processing machinery in head and neck cancer. *Clin. Cancer Res.* **12**, 3890–3895, <https://doi.org/10.1158/1078-0432.CCR-05-2750>
- 37 Whiteside, T.L. (1998) Immune cells in the tumor microenvironment. Mechanisms responsible for functional and signaling defects. *Adv. Exp. Med. Biol.* **451**, 167–171, [https://doi.org/10.1007/978-1-4615-5357-1\\_27](https://doi.org/10.1007/978-1-4615-5357-1_27)
- 38 Wouters, M.C.A. and Nelson, B.H. (2018) Prognostic significance of tumor-infiltrating B cells and plasma cells in human cancer. *Clin. Cancer Res.* **24**, 6125–6135, <https://doi.org/10.1158/1078-0432.CCR-18-1481>
- 39 Ma, X.J., Pan, X.L., Lv, Z.H., Xu, F.L., Liu, D.Y., Lei, D.P. et al. (2009) Therapeutic influence on circulating and monocyte-derived dendritic cells in laryngeal squamous cell carcinoma patients. *Acta Otolaryngol.* **129**, 84–91, <https://doi.org/10.1080/00016480802020459>
